# Supplementary material for: An efficient blue-excitable broadband Y3ScAl4O12:Ce3+ garnet phosphor for WLEDs
Source: Royal Society of Chemistry journal article supplement (doi:10.1039/d3dt01898a), 2023-01-01
Supplement: d3dt01898a1.pdf [file d3dt01898a1.pdf]

# An efficient blue-excitable broadband $\text{Y}_3\text{ScAl}_4\text{O}_{12}:\text{Ce}^{3+}$ garnet phosphor for WLEDs

Hanwei Zhao,<sup>a,c</sup> Dashuai Sun,<sup>\*a,d</sup> Zeyu Lyu,<sup>a</sup> Sida Shen,<sup>a</sup> Lixuan Wang,<sup>a</sup> Luhui Zhou,<sup>a</sup>  
Zheng Lu,<sup>a</sup> Jianhui Wang,<sup>a</sup> Jinhua He,<sup>\*b</sup> and Hongpeng You<sup>\*a,c</sup>

<sup>a</sup>Key Laboratory of Rare Earths, Chinese Academy of Sciences; Ganjiang Innovation  
Academy, Chinese Academy of Sciences, Ganzhou 341000, China.

E-mail: hpyou@ciac.ac.cn, dssun@gia.cas.cn

<sup>b</sup>Jiangsu Bree Optronics Company Limited, Nanjing 210000, China.

E-mail: hejinhua\_2001@aliyun.com

<sup>c</sup>School of Rare Earths, University of Science and Technology of China, Hefei 230026,  
P. R. China.

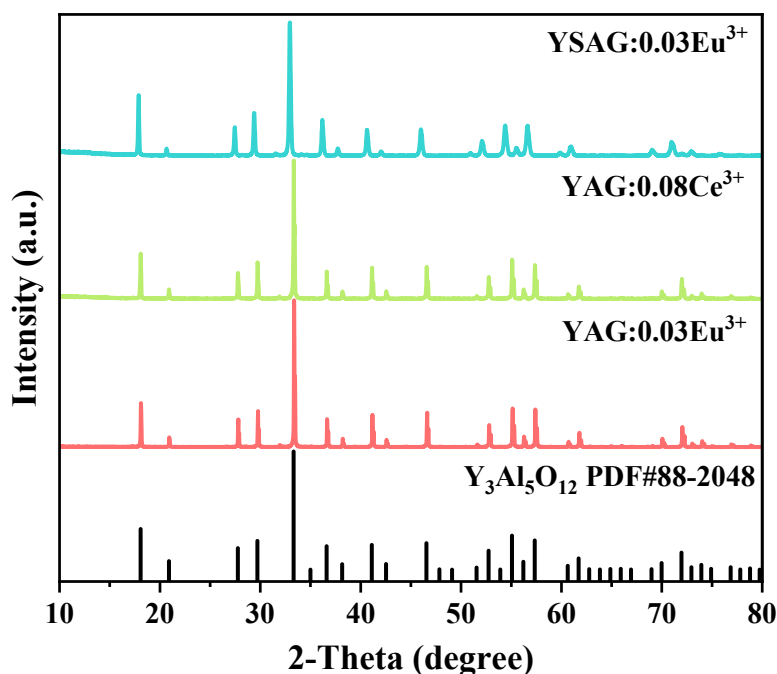

**Figure S1.** XRD patterns of the YSAO:0.03Eu<sup>3+</sup>, YAG:0.03Eu<sup>3+</sup> and YAG:0.08Ce<sup>3+</sup>.

**Table S1.** Bond lengths in YAG:0.08Ce<sup>3+</sup> and YSAO:0.08Ce<sup>3+</sup>.

| Sampls                    | Y-O1 (Å) | Y-O2 (Å) | (Sc/Al1)-O (Å) | Al2-O (Å) |
|---------------------------|----------|----------|----------------|-----------|
| YAG:0.08Ce <sup>3+</sup>  | 2.43     | 2.30     | 1.91           | 1.77      |
| YSAO:0.08Ce <sup>3+</sup> | 2.46     | 2.36     | 2.06           | 1.67      |

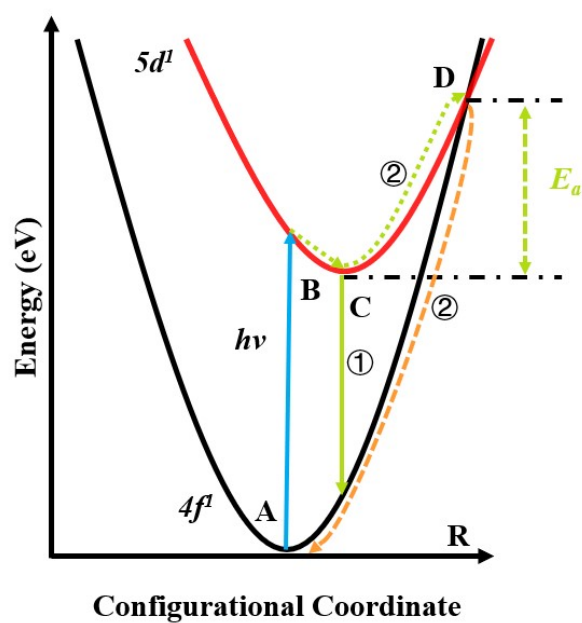

**Figure S2.** Configuration coordinate chart.
